# Supplementary material for: Self-supporting S@GO–FWCNTs composite films as positive electrodes for high-performance lithium–sulfur batteries
Source: Royal Society of Chemistry journal article supplement (doi:10.1039/c7ra10498g), 2018-01-01
Supplement: c7ra10498g1.pdf [file c7ra10498g1.pdf]

Supporting Information

## **Self-supporting S@GO-FWCNTs composite films as positive electrode for high-performance Lithium-sulfur battery**

Lifeng Cui,<sup>a\*</sup> Yanan Xue,<sup>a</sup> Suguru Noda,<sup>c</sup> and Zhongming Chen<sup>b\*</sup>

*<sup>a</sup>School of Materials Science and Engineering, University of Shanghai for Science School of Materials Science and Engineering, University of Shanghai for Science and Technology, Shanghai, 200093, China*

*<sup>b</sup>College of Chemistry and Environmental Engineering, Guangdong Engineering and Technology Research Center for Advanced Nanomaterials Dongguan University of Technology, Guangdong, People's Republic of China*

*<sup>c</sup>Department of Applied Chemistry, School of Advanced Science and Engineering, Waseda University, 3-4-1 Okubo, Shinjuku-ku, Tokyo 169-8555, Japan*

*\*Corresponding author. E-mail: cuilifeng\_usst@163.com; zmchen@dgut.edu.cn  
Tel: +86 76922861232*

Table S1 Sulfur content and electrochemical properties of flexible sulfur-based cathode in this work and literatures.

| Materials                                                               | methods             | Sulfur content (wt%) | Current rate | Capacity (mAh $\text{g}_{\text{electrode}}^{-1}$ ) | Cycle number |
|-------------------------------------------------------------------------|---------------------|----------------------|--------------|----------------------------------------------------|--------------|
| This work                                                               | vacuum-filtrated    | 66.1                 | 3C           | 482.1/385.7                                        | 500          |
| Flexible Carbon Nanotubes-Graphene/Sulfur Composite Film <sup>[1]</sup> | vacuum-filtrated    | 53                   | 1C           | 483/325                                            | 100          |
| Graphene-sulfur paper <sup>[2]</sup>                                    | vacuum infiltration | 67                   | 0.1C         | 700/600                                            | 100          |
| Fibrous graphene - sulfur (G - S) hybrid <sup>[3]</sup>                 | freeze-drying       | 63                   | 0.5C         | 700/541                                            | 100          |
| Graphene/carbon nanotube/Sulfur hybrid <sup>[4]</sup>                   | freeze-drying       | 70.3                 | 1C           | 776/657                                            | 450          |

## REFERENCES

1. Y. Chen, S.T. Lu, X.H. Wu and J. Liu, Flexible Carbon Nanotube-Graphene/Sulfur Composite Film: Free-Standing Cathode for High-Performance Lithium/Sulfur Batteries, *Journal of Physical Chemistry C*, 2015, **119**, 10288.
2. J. Jin, Z.Y. Wen, G.Q. Ma, Y. Lu, Y.M. Cui, M.F. Wu, X. Liang and X.W. Wu, Flexible self-supporting graphene-sulfur paper for lithium sulfur batteries, *Rsc Advances*, 2013, **3**, 2558.
3. G.M. Zhou, L.C. Ying, D.W. Wang, L. LI, S.F. Pei, L.R. Gentle, F. Li and H.M. Cheng, Fibrous Hybrid of Graphene and Sulfur Nanocrystals for High-Performance Lithium-Sulfur Batteries, *Acs Nano*, 2013, **7**, 5367.
4. S.Z. Niu, W. Lv, C. Zhang, Y.T. Shi, J.F. Zhao, B.H. Li, Q.H. Yang and F.Y. Kang, One-pot self-assembly of graphene/carbon nanotube/sulfur hybrid with three dimensionally interconnected structure for lithium-sulfur batteries, *Journal of Power Sources*, 2015, **295**, 182.
